# Supplementary material for: Molecular Characterization of MaCCS, a Novel Copper Chaperone Gene Involved in Abiotic and Hormonal Stress Responses in Musa acuminata cv. Tianbaojiao
Source: PubMed Central journal article supplement (PMC4848897; doi:10.3390/ijms17040441), 2016-03-24
Supplement: ijms-17-00441-s001.pdf [file ijms-17-00441-s001.pdf]

# Supplementary Materials: Molecular Characterization of MaCCS, a Novel Copper Chaperone Gene Involved in Abiotic and Hormonal Stress Responses in *Musa acuminata* cv. Tianbaojiao

Xin Feng, Fanglan Chen, Weihua Liu, Min Kyaw Thu, Zihao Zhang, Yukun Chen, Chunzhen Cheng, Yuling Lin, Tianchi Wang and Zhongxiong Lai

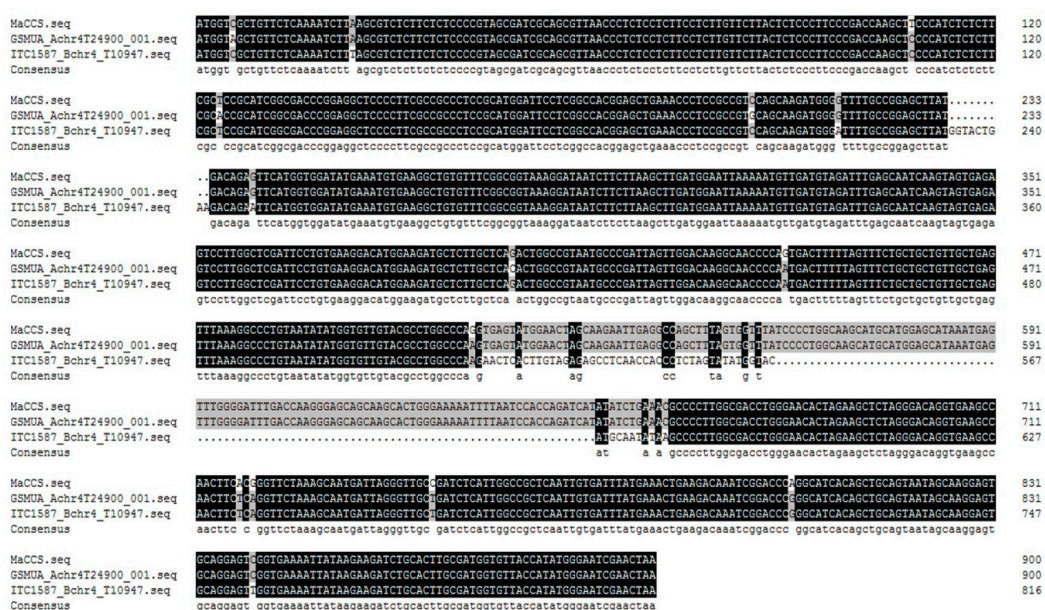

**Figure S1.** Sequence alignments of CCs from Tianbaojiao and two wild bananas. Nucleotides identical in all sequences are indicated with a black background, and nucleotides conserved only between two sequences are indicated with a gray background.

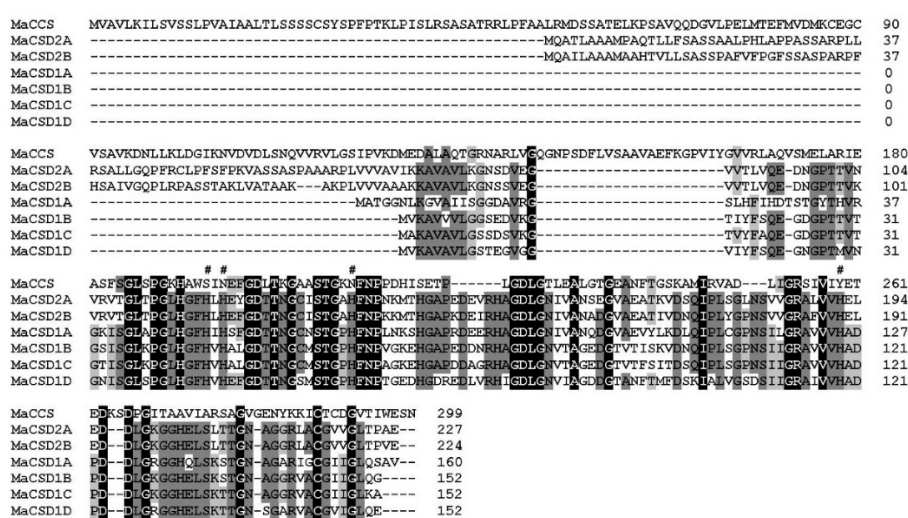

**Figure S2.** Multiple sequence alignment of the deduced MaCCS protein and Cu/ZnSOD (MaCSD) proteins. Identical conserved residues are shown with a black background, while similar residues are indicated with a gray background. Gaps (-) have been introduced to optimize the alignment. A hash sign (#) indicates the copper-binding ligands (histidine residues) of Cu/ZnSODs. Amino acid sequences of the MaCSDs are downloaded from the NCBI database with the following accession numbers: MaCSD2A (AFV46365), MaCSD2B (AIF32069), MaCSD1A (AFC17494), MaCSD1B (AGC13157), MaCSD1C (AGC13158) and MaCSD1D (AGC85069).

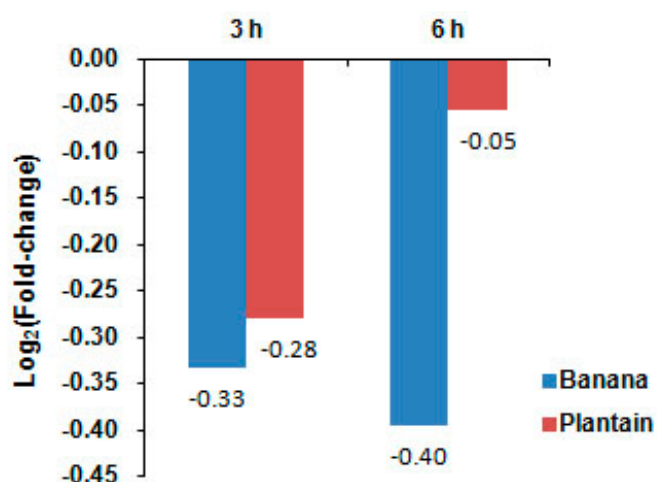

**Figure S3.** Expression levels of the CCS gene (genome locus ID: GSMUA\_Achr4G24900\_001) in response to cold treatment (10 °C) according to the transcriptomics data. The expressions of CCS are presented using fold change compared to control (0 h). Log<sub>2</sub> (fold-change value) is shown at the top of bar.

**Table S1.** Oligonucleotide primers used in this study.

| Primer Name     | Primer Sequence (5'–3')                                  | Tm/°C | Extension Time/s | Purpose                     |
|-----------------|----------------------------------------------------------|-------|------------------|-----------------------------|
| CCS-ORFF        | GCAAGTAATAAAAGAGTGAATCGGAG                               | 54    | 55               | ORF/gDNA amplification      |
| CCS-ORFR        | CTTACAGCAGGTCAGTGTGG                                     |       |                  |                             |
| CCS-5R1<br>5P   | CACTAAAGCTGGCCTCAATTCTTGC<br>CGACTGGAGCACGAGGACACTGA     | 58    | 35               | 1st round of<br>5'RACE      |
| CCS-5R2<br>5NP  | GCCAAGGACTCTCACTACTTGATTGC<br>GGACACTGACATGGACTGAAGGAGTA | 60    | 30               | 2nd round of<br>5'RACE      |
| CCS-3F1<br>AUAP | GAGCAATCAAGTAGTGAGAGTCCTTG<br>GGCCACGCGTCGACTAGTAC       | 58    | 50               | 1st round of<br>3'RACE      |
| CCS-3F2<br>AUAP | CTAGCAAGAATTGAGGCCAGCTTTAG<br>GGCCACGCGTCGACTAGTAC       | 60    | 40               | 2nd round of<br>3'RACE      |
| CCS-ProF        | GAACATGAGCATCCTGATAAAAGTG                                | 55    | 120              | Promoter<br>amplification   |
| CCS-ProR        | AAGAGGAGAGGGTTAACGCTG                                    |       |                  |                             |
| CCS-SubF        | CATGCCATGGATGGTCGCTGTCTCAAATC *                          | 51    | 54               | Subcellular<br>localization |
| CCS-SubR        | GGACTAGTGTTCCGATTCCCATATGGTAAC *                         |       |                  |                             |
| CAC-QF          | AACTCCTATGTTGCTCGCTTATG                                  | 57    | 30               | qRT-PCR                     |
| CAC-QR          | GGCTACTACTTCGGTTCCTTAC                                   |       |                  |                             |
| CCS-QF          | GAAGATGCTCTTGCTCAGACTG                                   | 57    | 30               | qRT-PCR                     |
| CCS-QR          | GGCTAGTCCATACTCACCTGG                                    |       |                  |                             |

\* Restriction enzyme sites are in bold.
